# Supplementary material
Source: PubMed Central journal article supplement (PMC5423085)
Supplement: cmi201591x1.pdf [file cmi201591x1.pdf]

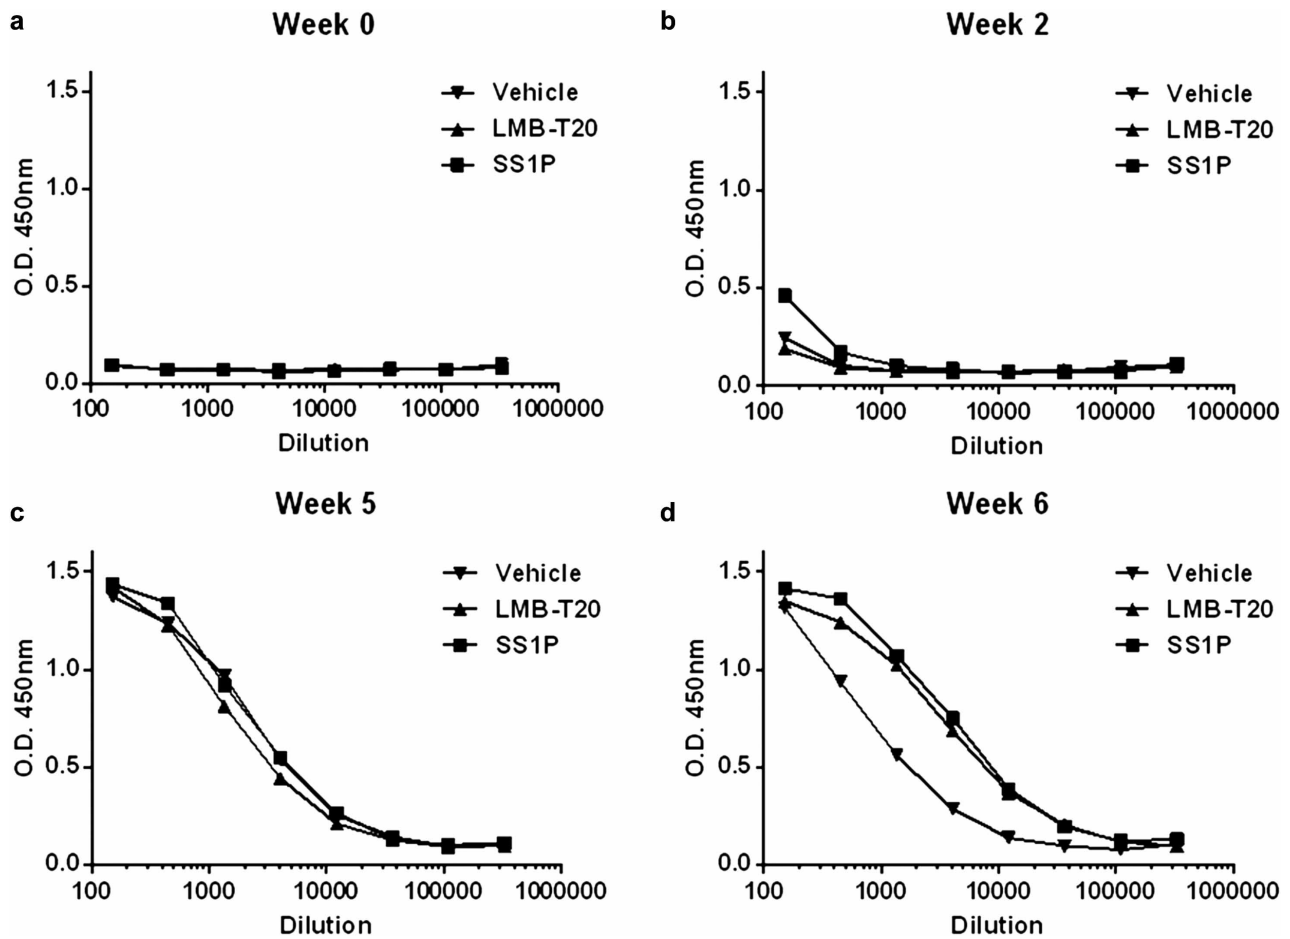

**Supplementary Figure S1** Mice response to HSA does not change due to RIT immunization. IgG titer against carrier protein anti-HSA in mice that were immunized with either 0.2% HSA, LMB-T20+0.2% HSA or SS1P+0.2% HSA. (a) Before immunization, (b) After 2 weeks of weekly immunizations, (c) After five immunizations, (d) After six immunizations.

**Supplementary Table S1 Amino acid sequence of peptides used in alanine scan**

| Peptide name    | Amino acid sequence   |
|-----------------|-----------------------|
| <b>WT 13-15</b> | GYPVQRLVALYLAARLSWNQV |
| 13-15 G288A     | AYPVQRLVALYLAARLSWNQV |
| 13-15 Y289A     | GAPVQRLVALYLAARLSWNQV |
| 13-15 P290A     | GYPVQRLVALYLAARLSWNQV |
| 13-15 V291A     | GYPVQRLVALYLAARLSWNQV |
| 13-15 Q292A     | GYPVQRLVALYLAARLSWNQV |
| 13-15 R293A     | GYPVQRLVALYLAARLSWNQV |
| 13-15 L294A     | GYPVQRLVALYLAARLSWNQV |
| 13-15 V295A     | GYPVQRLVALYLAARLSWNQV |
| 13-15 A296G     | GYPVQRLVALYLAARLSWNQV |
| 13-15 L297A     | GYPVQRLVALYLAARLSWNQV |
| 13-15 Y298A     | GYPVQRLVALYLAARLSWNQV |
| 13-15 L299A     | GYPVQRLVALYLAARLSWNQV |
| 13-15 A301G     | GYPVQRLVALYLAARLSWNQV |
| 13-15 A302G     | GYPVQRLVALYLAARLSWNQV |
| 13-15 R303A     | GYPVQRLVALYLAARLSWNQV |
| 13-15 L304A     | GYPVQRLVALYLAARLSWNQV |
| 13-15 S305A     | GYPVQRLVALYLAARLSWNQV |
| 13-15 W306A     | GYPVQRLVALYLAARLSWNQV |
| <b>WT 57-58</b> | FVGYHGTFLAAQSIVFG     |
| 57-58 F436A     | AVGYHGTFLAAQSIVFG     |
| 57-58 V437A     | FAGYHGTFLAAQSIVFG     |
| 57-58 G438A     | FVAYHGTFLAAQSIVFG     |
| 57-58 Y439A     | FVGAHGTFLAAQSIVFG     |
| 57-58 H440A     | FVGYAGTFLAAQSIVFG     |
| 57-58 T442A     | FVGYHGAFLAAQSIVFG     |
| 57-58 F443A     | FVGYHGTALAAQSIVFG     |
| 57-58 L444A     | FVGYHGTFAAAQSIVFG     |
| 57-58 A446G     | FVGYHGTFLAQAQSIVFG    |
| 57-58 A447G     | FVGYHGTFLAQAQSIVFG    |
| 57-58 S449A     | FVGYHGTFLAAQAIVFG     |
| 57-58 I450A     | FVGYHGTFLAAQSAVFG     |
| 57-58 V451A     | FVGYHGTFLAAQSAIFG     |
| 57-58 F452A     | FVGYHGTFLAAQSIVAG     |

Amino acids that were mutated are labeled in red
